# Supplementary material
Source: Springer Nature journal article supplement (https://www.springermedizin.de/resource/supplementary/12968_2013_3311_MOESM12_ESM.pdf/9583596)

# Inter-Observer Agreement for Category Assignments of 90 CMR Studies

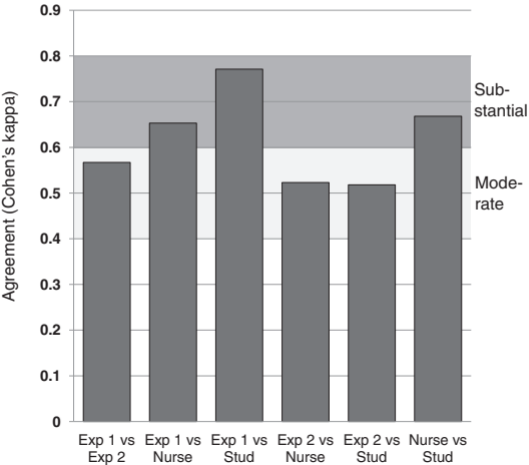

Supplement: MOESM12 [file 9583596]
